# Supplementary material for: The LDL Apolipoprotein B-to-LDL Cholesterol Ratio: Association with Cardiovascular Mortality and a Biomarker of Small, Dense LDLs
Source: MDPI journal article supplement (doi:10.3390/biomedicines10061302), 2022-06-02
Supplement: s1 [file s1]

# **The LDL-Apolipoprotein B to LDL-Cholesterol Ratio: Association with Cardiovascular Mortality and a Biomarker of Small Dense LDL**

*Silbernagel et al.: Calculated Small Dense LDL and Cardiovascular Risk*

Günther Silbernagel, MD<sup>a</sup>, Hubert Scharnagl, PhD<sup>b\*</sup>, Christoph Saely, MD<sup>c, d</sup>, Markus Reinthaler MD<sup>e, f</sup>,  
Martin Rief, MD<sup>g</sup>, Marcus E. Kleber, PhD<sup>h, i</sup>, Barbara Larcher, MD<sup>c, d</sup>, M. John Chapman, PhD/Dsc<sup>j</sup>,  
Juergen R. Schaefer, MD<sup>k</sup>, Heinz Drexel, MD<sup>d, l, m, n</sup>  
Winfried März, MD<sup>b, h, o</sup>

Medical University of Graz, Austria

<sup>a</sup>Division of Angiology, Department of Internal Medicine, Medical University of Graz; Auenbruggerplatz 15, 8036 Graz, Austria  
<sup>b</sup>Clinical Institute of Medical and Chemical Laboratory Diagnostics, Medical University of Graz; Auenbruggerplatz 15, 8036 Graz, Austria  
<sup>c</sup>Department of Medicine I, Academic Teaching Hospital Feldkirch, Carinagasse 47, Feldkirch, 6800, Austria  
<sup>d</sup>Vorarlberg Institute for Vascular Investigation and Treatment (VIVIT), Carinagasse 47, Feldkirch, 6800, Austria.  
<sup>e</sup>Department of Cardiology, Charité-Universitätsmedizin Berlin (CBF), Hindenburgdamm 30, 12203 Berlin, Germany  
<sup>f</sup>Institute of Biomaterial Science, Helmholtz-Zentrum Geesthacht, Kantstraße 55, 14513 Teltow, Germany  
<sup>g</sup>Division of General Anaesthesiology, Emergency and Intensive Care Medicine, Medical University of Graz, Auenbruggerplatz 5, 8036, Graz, Austria  
<sup>h</sup>Department of Internal Medicine 5 (Nephrology, Hypertensiology, Endocrinology, Diabetology, Rheumatology), Mannheim Medical Faculty, University of Heidelberg, Theodor-Kutzer-Ufer 1-3, 68167 Mannheim, Germany  
<sup>i</sup>Synlab Human Genetics Laboratory, Synlab AG, Harrlachweg 1, 68163 Mannheim  
<sup>j</sup>Sorbonne University and Pitie-Salpetriere University Hospital, and National Institute for Health and Medical Research (INSERM), e83, Boulevard de l'Hopital, 75651 Paris, France.  
<sup>k</sup>Center for Undiagnosed and Rare Diseases, University Clinic Marburg, Baldinger Str. 1, D-35043, Marburg, Germany  
<sup>l</sup>Private University of the Principality of Liechtenstein, Dorfstr. 24, Triesen, 9495, Liechtenstein.  
<sup>m</sup>Drexel University College of Medicine, 2900 W Queen Lane, Philadelphia, PA, 19129, USA  
<sup>n</sup>Department of Internal Medicine, Landeskrankenhaus Bregenz, Carl-Pedenz-Straße 2, 6900, Bregenz, Austria, Synlab Academy, Synlab Holding Germany GmbH, P5, 7, 68167, Mannheim, Germany  
<sup>o</sup>Synlab Academy, Synlab Holding Germany GmbH, P5, 7, 68167, Mannheim, Germany

## **Supplementary Materials**

## Supplementary Table S1

**Title:** Baseline characteristics according to LDLapoB/LDL<sub>C</sub><sub>meas</sub> quartiles in statin-naïve LURIC patients

|                                               | 1 <sup>st</sup> quartile | 2 <sup>nd</sup> quartile | 3 <sup>rd</sup> quartile | 4 <sup>th</sup> quartile | p*      |
|-----------------------------------------------|--------------------------|--------------------------|--------------------------|--------------------------|---------|
| <b>Number</b>                                 | 605                      | 473                      | 349                      | 321                      | -       |
| <b>Male sex</b>                               | 327 (54)                 | 330 (69.8)               | 262 (75.1)               | 250 (77.9)               | <0.001  |
| <b>Age, years</b>                             | 62.8 (11.1)              | 62.6 (11.5)              | 62.7 (10.8)              | 61.5 (10.8)              | 0.372   |
| <b>Body mass index, kg/m<sup>2</sup></b>      | 26.7 (3.9)               | 27 (4)                   | 28.1 (4.4)               | 28.7 (4.2)               | <0.001  |
| <b>Hypertension</b>                           | 412 (68.1)               | 350 (74.0)               | 260 (74.5)               | 253 (78.8)               | 0.004   |
| <b>Smoking</b>                                |                          |                          |                          |                          | <0.001  |
| Never                                         | 299 (49.4)               | 180 (38.1)               | 124 (35.5)               | 100 (31.2)               |         |
| Former                                        | 210 (34.7)               | 202 (42.7)               | 162 (46.4)               | 151 (47.0)               |         |
| Current                                       | 96 (15.9)                | 91 (19.2)                | 63 (18.1)                | 70 (21.8)                |         |
| <b>ADA 2010</b>                               | 175 (28.9)               | 162 (34.2)               | 170 (48.7)               | 161 (50.2)               | <0.001  |
| <b>Lipids §</b>                               |                          |                          |                          |                          |         |
| Total cholesterol, mg/dl†                     | 210 (37)                 | 196 (32)                 | 197 (36)                 | 194 (40)                 | <0.001  |
| LDL cholesterol, mg/dl†                       | 137 (34)                 | 124 (27)                 | 122 (27)                 | 102 (29)                 | <0.001  |
| HDL cholesterol, mg/dl†                       | 46 (12)                  | 41 (10)                  | 36 (9)                   | 32.6 (8.5)               | <0.001  |
| Triglycerides, mg/dl ‡                        | 118 (44)                 | 140 (52)                 | 182 (68)                 | 279 (170)                | <0.001§ |
| LDL triglycerides, mg/dl‡                     | 29 (10)                  | 30 (10)                  | 34 (12)                  | 36 (15)                  | <0.001§ |
| Total apolipoprotein B, mg/dl                 | 103 (23)                 | 105 (21)                 | 113 (24)                 | 114 (25)                 | <0.001  |
| LDL apolipoprotein B, mg/dl                   | 88 (22)                  | 88 (19)                  | 92 (21)                  | 86 (22)                  | 0.004   |
| LDL apolipoprotein B to LDL cholesterol ratio | 0.65 (0.03)              | 0.71 (0.01)              | 0.75 (0.02)              | 0.86 (0.13)              | -       |
| LDL diameter, nm                              | 16.9 (0.4)               | 16.6 (0.3)               | 16.5 (0.3)               | 16.2 (0.5)               | <0.001  |
| <b>C-reactive protein, mg/l</b>               | 5.4 (11.4)               | 8.0 (16.1)               | 9.7 (16.9)               | 9.4 (17.3)               | <0.001§ |
| <b>Coronary artery disease   </b>             |                          |                          |                          |                          | <0.001  |
| No                                            | 251 (41.8)               | 168 (36)                 | 98 (28.8)                | 94 (29.9)                |         |
| Stable angina                                 | 259 (43.2)               | 204 (43.7)               | 157 (46.2)               | 155 (49.4)               |         |
| Acute coronary syndrome                       | 90 (15)                  | 95 (20.3)                | 85 (25)                  | 65 (20.7)                |         |
| <b>NYHA functional class</b>                  |                          |                          |                          |                          | 0.393   |
| I                                             | 311 (51.4)               | 239 (50.5)               | 168 (48.1)               | 154 (48)                 |         |
| II                                            | 194 (32.1)               | 140 (29.6)               | 113 (32.4)               | 97 (30.2)                |         |
| III                                           | 88 (14.5)                | 79 (16.7)                | 53 (15.2)                | 56 (17.4)                |         |
| IV                                            | 12 (2.0)                 | 15 (3.2)                 | 15 (4.3)                 | 14 (4.4)                 |         |
| <b>Left ventricular function #</b>            |                          |                          |                          |                          | <0.001  |
| Normal                                        | 429 (74.4)               | 304 (66.8)               | 190 (58.1)               | 183 (60.4)               |         |
| Midly impaired                                | 65 (11.3)                | 63 (13.8)                | 45 (13.8)                | 44 (14.5)                |         |
| Moderately impaired                           | 40 (6.9)                 | 44 (9.7)                 | 41 (12.5)                | 38 (12.5)                |         |
| Severely impaired                             | 15 (2.6)                 | 22 (4.8)                 | 26 (8)                   | 20 (6.6)                 |         |
| <b>Friesinger score</b>                       |                          |                          |                          |                          | <0.001  |
| 1 <sup>st</sup> quartile                      | 242 (40)                 | 150 (31.7)               | 96 (27.5)                | 100 (31.2)               |         |
| 2 <sup>nd</sup> quartile                      | 176 (29.1)               | 132 (27.9)               | 95 (27.2)                | 74 (23.1)                |         |
| 3 <sup>rd</sup> quartile                      | 125 (20.7)               | 115 (24.3)               | 90 (25.8)                | 84 (26.2)                |         |
| 4 <sup>th</sup> quartile                      | 62 (10.2)                | 76 (16.1)                | 68 (19.5)                | 63 (19.6)                |         |
| <b>Peripheral vascular disease</b>            | 27 (4.5)                 | 37 (7.8)                 | 28 (8)                   | 40 (12.5)                | <0.001  |
| <b>Cerebrovascular disease</b>                | 51 (8.4)                 | 37 (7.8)                 | 39 (11.2)                | 27 (8.4)                 | 0.365   |
| <b>Non-statin lipid lowering drugs</b>        | 15 (2.5)                 | 15 (3.2)                 | 12 (3.4)                 | 13 (4)                   | 0.606   |

**Legend:** Values are means ± standard deviations or medians (25<sup>th</sup>-75<sup>th</sup> percentiles) in cases of continuous variables and numbers (percentages) in cases of categorical data; \* for differences across the 4 groups calculated with  $\chi^2$  test and ANalysis of VAriance for categorical and continuous data, respectively; † to convert to millimoles per liter, multiply by 0.02586; ‡ to convert to millimoles per liter, multiply by 0.01129; § ANalysis Of VAriance of logarithmically transformed values; || 600/467/340/314; # 549/433/302/285

## Supplementary Table S2

**Title:** Baseline characteristics according to LDLapoB/LDL<sub>C</sub><sub>meas</sub> quartiles in LURIC patients on statins

|                                             | 1 <sup>st</sup> quartile | 2 <sup>nd</sup> quartile | 3 <sup>rd</sup> quartile | 4 <sup>th</sup> quartile | p*      |
|---------------------------------------------|--------------------------|--------------------------|--------------------------|--------------------------|---------|
| <b>Number</b>                               | 231                      | 337                      | 472                      | 503                      | -       |
| <b>Male sex</b>                             | 129 (55.8)               | 240 (71.2)               | 367 (77.8)               | 389 (77.3)               | <0.001  |
| <b>Age, years</b>                           | 64.4 (9.8)               | 64 (9.1)                 | 62.7 (10.1)              | 61.3 (10.4)              | <0.001  |
| <b>Body mass index, kg/m<sup>2</sup></b>    | 26.8 (4.1)               | 27.2 (3.5)               | 27.7 (4)                 | 28.2 (4.1)               | <0.001  |
| <b>Hypertension</b>                         | 160 (69.3)               | 238 (70.6)               | 342 (72.5)               | 376 (74.8)               | 0.384   |
| <b>Smoking</b>                              |                          |                          |                          |                          | 0.001   |
| Never                                       | 97 (42)                  | 107 (31.8)               | 145 (30.7)               | 134 (26.6)               |         |
| Former smoker                               | 92 (39.8)                | 165 (49)                 | 210 (44.5)               | 263 (52.3)               |         |
| Current smoker                              | 42 (18.2)                | 65 (19.3)                | 117 (24.8)               | 106 (21.1)               |         |
| <b>Diabetes mellitus</b>                    | 73 (31.6)                | 122 (36.2)               | 195 (41.3)               | 253 (50.3)               | <0.001  |
| <b>Lipids</b>                               |                          |                          |                          |                          |         |
| Total cholesterol, mg/dl†                   | 201 (44)                 | 187 (35)                 | 180 (35)                 | 175 (41)                 | <0.001  |
| LDL cholesterol, mg/dl†                     | 130 (42)                 | 117 (32)                 | 109 (30)                 | 91 (28)                  | <0.001  |
| HDL cholesterol, mg/dl†                     | 44 (11)                  | 40 (9)                   | 36.7 (9.5)               | 32 (7)                   | <0.001  |
| Triglycerides, mg/dl ‡                      | 122 (48)                 | 139 (60)                 | 161 (60)                 | 255 (193)                | <0.001§ |
| LDL triglycerides, mg/dl‡                   | 31(11)                   | 30 (10)                  | 32 (11)                  | 32 (13)                  | 0.257§  |
| Total apolipoprotein B, mg/dl               | 99.5 (27.6)              | 99.7 (24)                | 101 (24)                 | 102 (26)                 | 0.384   |
| LDL apolipoprotein B, mg/dl                 | 84 (27)                  | 83 (22)                  | 82 (23)                  | 77 (22)                  | <0.001  |
| LDLapolipoprotein B to LDLcholesterol ratio | 0.65 (0.03)              | 0.71 (0.01)              | 0.76 (0.02)              | 0.85 (0.08)              | -       |
| LDL diameter, nm                            | 17.0 (0.4)               | 16.6 (0.3)               | 16.5 (0.3)               | 16.2 (0.3)               | <0.001  |
| <b>C-reactive protein, mg/l</b>             | 7.7 (17.7)               | 8.2 (14.3)               | 11.6 (23.3)              | 12.5 (23.7)              | <0.001§ |
| <b>Coronary artery disease   </b>           |                          |                          |                          |                          | <0.001  |
| No                                          | 38 (16.9)                | 21 (6.5)                 | 29 (6.5)                 | 34 (7.1)                 |         |
| Stable Angina                               | 113 (50.2)               | 184 (56.6)               | 236 (53.0)               | 223 (46.7)               |         |
| ACS                                         | 74 (32.9)                | 120 (36.9)               | 180 (40.4)               | 221 (46.2)               |         |
| <b>NYHA functional class</b>                |                          |                          |                          |                          | 0.220   |
| I                                           | 121 (52.4)               | 187 (55.5)               | 269 (57)                 | 261 (51.9)               |         |
| II                                          | 71 (30.7)                | 93 (27.6)                | 116 (24.6)               | 138 (27.4)               |         |
| III                                         | 38 (16.5)                | 46 (13.6)                | 71 (15)                  | 90 (17.9)                |         |
| IV                                          | 1 (0.4)                  | 11 (3.3)                 | 16 (3.4)                 | 14 (2.8)                 |         |
| <b>Left ventricular function #</b>          |                          |                          |                          |                          | 0.884   |
| Normal                                      | 137 (61.4)               | 198 (60.6)               | 257 (55.2)               | 271 (55.2)               |         |
| Midly impaired                              | 34 (15.2)                | 50 (15.3)                | 81 (17.4)                | 78 (15.9)                |         |
| Moderately impaired                         | 22 (9.9)                 | 39 (11.9)                | 62 (13.3)                | 64 (13)                  |         |
| Severely impaired                           | 8 (3.6)                  | 14 (4.3)                 | 18 (3.9)                 | 21 (4.3)                 |         |
| <b>Friesinger score</b>                     |                          |                          |                          |                          | <0.001  |
| 1 <sup>st</sup> quartile                    | 40 (17.3)                | 26 (7.7)                 | 25 (5.3)                 | 35 (7.0)                 |         |
| 2 <sup>nd</sup> quartile                    | 47 (20.3)                | 50 (14.8)                | 73 (15.5)                | 94 (18.7)                |         |
| 3 <sup>rd</sup> quartile                    | 77 (33.3)                | 146 (43.3)               | 214 (45.3)               | 211 (41.9)               |         |
| 4 <sup>th</sup> quartile                    | 67 (29)                  | 115 (34.1)               | 160 (33.9)               | 163 (32.4)               |         |
| <b>Peripheral vascular disease</b>          | 22 (9.5)                 | 40 (11.9)                | 54 (11.4)                | 61 (12.1)                | 0.770   |
| <b>Cerebrovascular disease</b>              | 23 (10)                  | 25 (7.4)                 | 47 (10)                  | 50 (9.9)                 | 0.576   |
| <b>Non-statin lipid lowering drugs</b>      | 2 (0.9)                  | 6 (1.8)                  | 3 (0.6)                  | 13 (2.6)                 | 0.075   |

**Legend:** Values are means  $\pm$  standard deviations or medians (25<sup>th</sup>-75<sup>th</sup> percentiles) in cases of continuous variables and numbers (percentages) in cases of categorical data; \* for differences across the 4 groups calculated with  $\chi^2$  test and ANalysis of VAriance for categorical and continuous data, respectively; † to convert to millimoles per liter, multiply by 0.02586; ‡ to convert to millimoles per liter, multiply by 0.01129; § ANalysis Of VAriance of logarithmically transformed values; || 225/325/445/478; # 201/301/418/434

## Supplementary Table S3

**Title:** Baseline characteristics according to LDLapoB/LDL<sub>C</sub><sub>calc</sub> quartiles in the entire LURIC cohort

|                                               | 1 <sup>st</sup> quartile | 2 <sup>nd</sup> quartile | 3 <sup>rd</sup> quartile | 4 <sup>th</sup> quartile | p*      |
|-----------------------------------------------|--------------------------|--------------------------|--------------------------|--------------------------|---------|
| <b>Number</b>                                 | 792                      | 793                      | 795                      | 793                      | -       |
| <b>Male sex</b>                               | 337 (42.6)               | 220 (27.7)               | 209 (26.3)               | 202 (25.5)               | <0.001  |
| <b>Age, years</b>                             | 63.2 (11.1)              | 62.9 (10.7)              | 62.7 (10.3)              | 62.2 (10.3)              | 0.283   |
| <b>Body mass index, kg/m<sup>2</sup></b>      | 26.4 (3.7)               | 27.1 (3.9)               | 27.7 (4.1)               | 28.6 (4.3)               | <0.001  |
| <b>Hypertension</b>                           | 538 (67.9)               | 555 (70.0)               | 584 (73.5)               | 616 (77.7)               | <0.001  |
| <b>Smoking</b>                                |                          |                          |                          |                          | <0.001  |
| Never                                         | 373 (47.1)               | 293 (36.9)               | 262 (33.0)               | 228 (28.8)               |         |
| Former                                        | 295 (37.2)               | 352 (44.4)               | 369 (46.4)               | 382 (48.2)               |         |
| Current                                       | 124 (15.7)               | 148 (18.7)               | 164 (20.6)               | 183 (23.1)               |         |
| <b>ADA 2010</b>                               | 209 (26.4)               | 271 (34.2)               | 347 (43.6)               | 413 (52.1)               | <0.001  |
| <b>Lipids §</b>                               |                          |                          |                          |                          |         |
| Total cholesterol, mg/dl †                    | 201 (41)                 | 194 (35)                 | 188 (37)                 | 183 (37)                 | <0.001  |
| LDL cholesterol, mg/dl †                      | 127 (39)                 | 122 (31)                 | 117 (31)                 | 105 (29)                 | <0.001  |
| HDL cholesterol, mg/dl †                      | 45 (12)                  | 41 (10)                  | 37 (10)                  | 34 (8)                   | <0.001  |
| Triglycerides, mg/dl ‡                        | 109 (40)                 | 135 (44)                 | 161 (48)                 | 224 (69)                 | <0.001§ |
| LDL triglycerides, mg/dl ‡                    | 27 (10)                  | 30 (10)                  | 33 (11)                  | 35 (13)                  | <0.001§ |
| Total apolipoprotein B, mg/dl                 | 97 (24)                  | 103 (22)                 | 106 (24)                 | 109 (26)                 | <0.001  |
| LDL apolipoprotein B, mg/dl                   | 83 (24)                  | 86 (21)                  | 87 (22)                  | 85 (22)                  | 0.002   |
| LDL apolipoprotein B to LDL cholesterol ratio | 0.66 (0.05)              | 0.71 (0.07)              | 0.75 (0.04)              | 0.81 (0.06)              | -       |
| LDL diameter, nm                              | 16.9 (0.4)               | 16.6 (0.4)               | 16.5 (0.3)               | 16.3 (0.4)               | <0.001  |
| <b>C-reactive protein, mg/l</b>               | 6.9 (18.0)               | 7.5 (13.9)               | 11.3 (22.0)              | 10.9 (18.9)              | <0.001  |
| <b>Coronary artery disease   </b>             |                          |                          |                          |                          | <0.001  |
| No                                            | 290 (37.2)               | 170 (21.8)               | 127 (16.7)               | 127 (16.8)               |         |
| Stable                                        | 343 (44.0)               | 391 (50.2)               | 405 (53.1)               | 330 (43.5)               |         |
| Acute coronary syndrome                       | 146 (18.7)               | 218 (28.0)               | 230 (30.2)               | 301 (39.7)               |         |
| <b>NYHA functional class</b>                  |                          |                          |                          |                          | 0.011   |
| I                                             | 420 (53.0)               | 417 (52.6)               | 426 (53.6)               | 394 (49.7)               |         |
| II                                            | 248 (31.3)               | 225 (28.4)               | 235 (29.6)               | 217 (27.4)               |         |
| III                                           | 110 (13.9)               | 120 (15.1)               | 115 (14.5)               | 153 (19.3)               |         |
| IV                                            | 14 (1.8)                 | 31 (3.9)                 | 19 (2.4)                 | 29 (3.7)                 |         |
| <b>Left ventricular function #</b>            |                          |                          |                          |                          | <0.001  |
| Normal                                        | 550 (76.9)               | 482 (67.7)               | 436 (62.8)               | 440 (62.4)               |         |
| Midly impaired                                | 89 (12.4)                | 113 (15.9)               | 122 (17.6)               | 118 (16.7)               |         |
| Moderately impaired                           | 51 (7.1)                 | 84 (11.8)                | 102 (14.7)               | 100 (14.2)               |         |
| Severely impaired                             | 25 (3.5)                 | 33 (4.6)                 | 34 (4.9)                 | 47 (6.7)                 |         |
| <b>Friesinger score</b>                       |                          |                          |                          |                          | <0.001  |
| 1 <sup>st</sup> quartile                      | 277 (35.0)               | 167 (21.1)               | 129 (16.2)               | 120 (15.1)               |         |
| 2 <sup>nd</sup> quartile                      | 205 (25.9)               | 172 (21.7)               | 165 (20.8)               | 177 (22.3)               |         |
| 3 <sup>rd</sup> quartile                      | 193 (24.4)               | 262 (33.0)               | 289 (36.4)               | 285 (35.9)               |         |
| 4 <sup>th</sup> quartile                      | 117 (14.8)               | 192 (24.2)               | 212 (26.7)               | 211 (26.6)               |         |
| <b>Peripheral vascular disease</b>            | 41 (5.2)                 | 72 (9.1)                 | 78 (9.8)                 | 97 (12.2)                | <0.001  |
| <b>Cerebrovascular disease</b>                | 65 (8.2)                 | 63 (7.9)                 | 87 (10.9)                | 75 (9.5)                 | 0.144   |
| <b>Statin</b>                                 | 222 (28.0)               | 331 (41.7)               | 447 (56.2)               | 482 (60.8)               | <0.001  |
| <b>Non-statin lipid lowering drug</b>         | 24 (3.0)                 | 13 (1.6)                 | 15 (1.9)                 | 18 (2.3)                 | 0.255   |

**Legend:** Values are means ± standard deviations or medians (25<sup>th</sup>-75<sup>th</sup> percentiles) in cases of continuous variables and numbers (percentages) in cases of categorical data; \* for differences across the 4 groups calculated with  $\chi^2$  test and ANalysis of VAriance for categorical and continuous data, respectively; † to convert to millimoles per liter, multiply by 0.02586; ‡ to convert to millimoles per liter, multiply by 0.01129; § ANalysis Of VAriance of logarithmically transformed values; || 779/779/762/758; #715/712/694/705

## Supplementary Table S4

**Title:** Baseline characteristics according to LDLapoB/LDLC<sub>calc</sub> quartiles in statin-naïve LURIC patients

|                                             | 1 <sup>st</sup> quartile | 2 <sup>nd</sup> quartile | 3 <sup>rd</sup> quartile | 4 <sup>th</sup> quartile | p*      |
|---------------------------------------------|--------------------------|--------------------------|--------------------------|--------------------------|---------|
| <b>Number</b>                               | 570                      | 462                      | 348                      | 311                      | -       |
| <b>Male sex</b>                             | 324 (56.8)               | 324 (70.1)               | 250 (71.8)               | 228 (73.3)               | <0.001  |
| <b>Age, years</b>                           | 62.7 (11.4)              | 62.6 (11.1)              | 62.5 (11.2)              | 62.8 (10.5)              | 0.974   |
| <b>Body mass index, kg/m<sup>2</sup></b>    | 26.4 (3.8)               | 27.3 (4.1)               | 27.8 (4.2)               | 28.8 (4.4)               | <0.001  |
| <b>Hypertension</b>                         | 391 (68.6)               | 336 (72.7)               | 255 (73.3)               | 247 (79.4)               | 0.007   |
| <b>Smoking</b>                              |                          |                          |                          |                          | 0.001   |
| Never                                       | 284 (49.8)               | 183 (39.6)               | 119 (34.2)               | 102 (32.8)               |         |
| Former smoker                               | 201 (35.3)               | 196 (42.4)               | 157 (45.1)               | 144 (46.3)               |         |
| Current smoker                              | 85 (14.9)                | 83 (18.0)                | 72 (20.7)                | 65 (20.9)                |         |
| <b>Diabetes mellitus</b>                    | 146 (25.6)               | 161 (34.8)               | 162 (46.6)               | 165 (53.1)               | <0.001  |
| <b>Lipids</b>                               |                          |                          |                          |                          |         |
| Total cholesterol, mg/dl†                   | 204 (38)                 | 201 (33)                 | 198 (35)                 | 193 (36)                 | <0.001  |
| LDL cholesterol, mg/dl†                     | 130 (36)                 | 128 (28)                 | 124 (27)                 | 114 (29)                 | <0.001  |
| HDL cholesterol, mg/dl†                     | 45 (12)                  | 41 (11)                  | 38 (10)                  | 34 (9)                   | <0.001  |
| Triglycerides, mg/dl ‡                      | 109 (40)                 | 138 (45)                 | 172 (51)                 | 234 (69)                 | <0.001§ |
| LDL triglycerides, mg/dl‡                   | 27 (9)                   | 30 (9)                   | 34 (11)                  | 37 (14)                  | <0.001§ |
| Total apolipoprotein B, mg/dl               | 99 (23)                  | 108 (20)                 | 112 (22)                 | 116 (24)                 | <0.001  |
| LDL apolipoprotein B, mg/dl                 | 85 (23)                  | 90 (19)                  | 92 (20)                  | 90 (21)                  | <0.001  |
| LDLapolipoprotein B to LDLcholesterol ratio | 0.66 (0.05)              | 0.71 (0.09)              | 0.74 (0.04)              | 0.80 (0.06)              | -       |
| LDL diameter, nm                            | 16.9 (0.4)               | 16.6 (0.4)               | 16.5 (0.4)               | 16.3 (0.4)               | <0.001  |
| <b>C-reactive protein, mg/l</b>             | 5.7 (13.9)               | 7.6 (14.1)               | 9.3 (17.0)               | 10.3 (17.2)              | <0.001§ |
| <b>Coronary artery disease   </b>           |                          |                          |                          |                          | <0.001  |
| No                                          | 255 (45.3)               | 149 (32.6)               | 103 (30.3)               | 91 (29.8)                |         |
| Stable Angina                               | 234 (41.6)               | 212 (46.4)               | 164 (48.2)               | 135 (44.3)               |         |
| ACS                                         | 74 (13.1)                | 96 (21.0)                | 73 (21.5)                | 79 (25.9)                |         |
| <b>NYHA functional class</b>                |                          |                          |                          |                          | 0.018   |
| I                                           | 300 (52.6)               | 232 (50.2)               | 176 (50.)                | 138 (44.4)               |         |
| II                                          | 184 (32.3)               | 132 (28.6)               | 113 (32.5)               | 97 (31.2)                |         |
| III                                         | 77 (13.5)                | 78 (16.9)                | 50 (14.4)                | 60 (19.3)                |         |
| IV                                          | 9 (1.6)                  | 20 (4.3)                 | 9 (2.6)                  | 16 (5.1)                 |         |
| <b>Left ventricular function #</b>          |                          |                          |                          |                          | 0.884   |
| Normal                                      | 414 (79.3)               | 288 (69.4)               | 202 (65.4)               | 176 (64.0)               |         |
| Midly impaired                              | 58 (11.1)                | 60 (14.5)                | 48 (15.5)                | 40 (14.5)                |         |
| Moderately impaired                         | 34 (6.5)                 | 45 (10.8)                | 41(13.3)                 | 36 (13.1)                |         |
| Severely impaired                           | 16 (3.1)                 | 22 (5.3)                 | 18 (5.8)                 | 23 (8.4)                 |         |
| <b>Friesinger score</b>                     |                          |                          |                          |                          | <0.001  |
| 1 <sup>st</sup> quartile                    | 239 (41.9)               | 144 (31.2)               | 100 (28.7)               | 90 (28.9)                |         |
| 2 <sup>nd</sup> quartile                    | 167 (29.3)               | 116 (25.1)               | 95 (27.3)                | 87 (28.0)                |         |
| 3 <sup>rd</sup> quartile                    | 109 (19.1)               | 123 (26.6)               | 90 (25.9)                | 77 (24.8)                |         |
| 4 <sup>th</sup> quartile                    | 55 (9.6)                 | 79 (17.1)                | 63 (18.1)                | 57 (18.3)                |         |
| <b>Peripheral vascular disease</b>          | 26 (4.6)                 | 34 (7.4)                 | 27 (7.8)                 | 34 (10.9)                | 0.005   |
| <b>Cerebrovascular disease</b>              | 45 (7.9)                 | 35 (7.6)                 | 43 (12.4)                | 27 (8.7)                 | 0.076   |
| <b>Non-statin lipid lowering drugs</b>      | 18 (3.2)                 | 12 (2.6)                 | 10 (2.9)                 | 9 (2.9)                  | 0.963   |

**Legend:** Values are means ± standard deviations or medians (25<sup>th</sup>-75<sup>th</sup> percentiles) in cases of continuous variables and numbers (percentages) in cases of categorical data; \* for differences across the 4 groups calculated with  $\chi^2$  test and ANalysis of VAriance for categorical and continuous data, respectively; † to convert to millimoles per liter, multiply by 0.02586; ‡ to convert to millimoles per liter, multiply by 0.01129; § ANalysis Of VAriance of logarithmically transformed values; || 563/457/340/305; # 522/415/309/275

## Supplementary Table S5

**Title:** Baseline characteristics according to LDLapoB/LDLC<sub>calc</sub> quartiles in LURIC patients on statins

|                                             | 1 <sup>st</sup> quartile | 2 <sup>nd</sup> quartile | 3 <sup>rd</sup> quartile | 4 <sup>th</sup> quartile | p*      |
|---------------------------------------------|--------------------------|--------------------------|--------------------------|--------------------------|---------|
| <b>Number</b>                               | 222                      | 331                      | 447                      | 482                      | -       |
| <b>Male sex</b>                             | 91 (41.0)                | 82 (24.8)                | 111 (24.8)               | 119 (24.7)               | <0.001  |
| <b>Age, years</b>                           | 64.7 (10.0)              | 63.5 (10.1)              | 62.9 (9.6)               | 61.9 (10.1)              | 0.004   |
| <b>Body mass index, kg/m<sup>2</sup></b>    | 26.4 (3.7)               | 26.8 (3.6)               | 27.7 (3.9)               | 28.4 (4.2)               | <0.001  |
| <b>Hypertension</b>                         | 147 (66.2)               | 219 (66.2)               | 329 (73.6)               | 369 (76.6)               | 0.002   |
| <b>Smoking</b>                              |                          |                          |                          |                          | 0.015   |
| Never                                       | 89 (40.1)                | 110 (33.2)               | 143 (32.0)               | 126 (26.1)               |         |
| Former smoker                               | 94 (42.3)                | 156 (47.1)               | 212 (47.4)               | 238 (49.4)               |         |
| Current smoker                              | 39 (17.6)                | 65 (19.6)                | 92 (20.6)                | 118 (24.5)               |         |
| <b>Diabetes mellitus</b>                    | 63 (28.4)                | 110 (33.2)               | 185 (41.4)               | 248 (51.5)               | <0.001  |
| <b>Lipids</b>                               |                          |                          |                          |                          |         |
| Total cholesterol, mg/dl†                   | 192 (45)                 | 184 (37)                 | 181 (38)                 | 176 (37)                 | <0.001  |
| LDL cholesterol, mg/dl†                     | 120 (44)                 | 114 (34)                 | 112 (32)                 | 100 (28)                 | <0.001  |
| HDL cholesterol, mg/dl†                     | 43 (11)                  | 41 (10)                  | 37 (9)                   | 34 (8)                   | <0.001  |
| Triglycerides, mg/dl ‡                      | 110 (41)                 | 130 (43)                 | 152 (45)                 | 217 (69)                 | <0.001§ |
| LDL triglycerides, mg/dl ‡                  | 28 (10)                  | 29 (10)                  | 32 (11)                  | 34 (13)                  | <0.001§ |
| Total apolipoprotein B, mg/dl               | 93 (26)                  | 97 (23)                  | 102 (25)                 | 105 (26)                 | <0.001  |
| LDL apolipoprotein B, mg/dl                 | 79 (27)                  | 81 (23)                  | 84 (23)                  | 81 (22)                  | 0.085   |
| LDLapolipoprotein B to LDLcholesterol ratio | 0.67 (0.04)              | 0.72 (0.04)              | 0.76 (0.04)              | 0.82 (0.06)              | -       |
| LDL diameter, nm                            | 16.9 (0.4)               | 16.6 (0.4)               | 16.5 (0.3)               | 16.3 (0.4)               | <0.001  |
| <b>C-reactive protein, mg/l</b>             | 10.1 (25.5)              | 7.4 (13.7)               | 12.8 (25.1)              | 11.3 (19.9)              | <0.001§ |
| <b>Coronary artery disease   </b>           |                          |                          |                          |                          | <0.001  |
| No                                          | 35 (16.2)                | 21 (6.5)                 | 24 (5.7)                 | 36 (7.9)                 |         |
| Stable Angina                               | 109 (50.5)               | 179 (55.6)               | 241 (57.1)               | 195 (43.0)               |         |
| Acute coronary syndrome                     | 72 (33.3)                | 122 (37.9)               | 157 (37.2)               | 222 (49.0)               |         |
| <b>NYHA functional class</b>                |                          |                          |                          |                          | 0.435   |
| I                                           | 120 (54.1)               | 195 (55.9)               | 250 (55.9)               | 256 (53.1)               |         |
| II                                          | 64 (28.8)                | 93 (28.1)                | 122 (27.3)               | 120 (24.9)               |         |
| III                                         | 33 (14.9)                | 42 (12.7)                | 65 (14.5)                | 93 (19.3)                |         |
| IV                                          | 5 (2.3)                  | 11 (3.3)                 | 10 (2.2)                 | 13 (2.7)                 |         |
| <b>Left ventricular function #</b>          |                          |                          |                          |                          | 0.369   |
| Normal                                      | 136 (70.5)               | 194 (65.3)               | 234 (60.8)               | 264 (61.4)               |         |
| Midly impaired                              | 31 (16.1)                | 53 (17.8)                | 74 (19.2)                | 78 (18.1)                |         |
| Moderately impaired                         | 17 (8.8)                 | 39 (13.1)                | 61 (15.8)                | 64 (14.9)                |         |
| Severely impaired                           | 9 (4.7)                  | 11 (3.7)                 | 16 (4.2)                 | 24 (5.6)                 |         |
| <b>Friesinger score</b>                     |                          |                          |                          |                          | <0.001  |
| 1 <sup>st</sup> quartile                    | 38 (17.1)                | 23 (6.9)                 | 29 (6.5)                 | 30 (6.2)                 |         |
| 2 <sup>nd</sup> quartile                    | 38 (17.1)                | 56 (16.9)                | 70 (15.7)                | 90 (18.7)                |         |
| 3 <sup>rd</sup> quartile                    | 84 (37.8)                | 139 (42.0)               | 199 (44.5)               | 208 (43.2)               |         |
| 4 <sup>th</sup> quartile                    | 62 (27.9)                | 113 (34.1)               | 149 (33.3)               | 154 (32.0)               |         |
| <b>Peripheral vascular disease</b>          | 15 (6.8)                 | 38 (11.5)                | 51 (11.4)                | 63 (13.1)                | 0.106   |
| <b>Cerebrovascular disease</b>              | 20 (9.0)                 | 28 (8.5)                 | 44 (9.8)                 | 48 (10.0)                | 0.883   |
| <b>Non-statin lipid lowering drugs</b>      | 6 (2.7)                  | 1 (0.3)                  | 5 (1.1)                  | 9 (1.9)                  | 0.087   |

**Legend:** Values are means  $\pm$  standard deviations or medians (25<sup>th</sup>-75<sup>th</sup> percentiles) in cases of continuous variables and numbers (percentages) in cases of categorical data; \* for differences across the 4 groups calculated with  $\chi^2$  test and ANalysis of VAriance for categorical and continuous data, respectively; † to convert to millimoles per liter, multiply by 0.02586; ‡ to convert to millimoles per liter, multiply by 0.01129; § ANalysis Of VAriance of logarithmically transformed values; || 216/322/422/453; # 193/297/385/430

## Supplementary Table S6

**Title:** Baseline characteristics according to LDLapoB/LDLC<sub>calc</sub> quartiles in the replication cohort

|                                          | 1 <sup>st</sup> quartile | 2 <sup>nd</sup> quartile | 3 <sup>rd</sup> quartile | 4 <sup>th</sup> quartile | <i>p</i> * |
|------------------------------------------|--------------------------|--------------------------|--------------------------|--------------------------|------------|
| <b>Number</b>                            | 415                      | 415                      | 415                      | 415                      |            |
| <b>Male sex</b>                          | 227 (54.7)               | 284 (68.4)               | 276 (66.5)               | 305 (73.5)               | <0.001     |
| <b>Age</b>                               | 66.2 (10.7)              | 65.3 (10.5)              | 63.9 (10.1)              | 62.3 (10.4)              | <0.001     |
| <b>Body mass index, kg/m<sup>2</sup></b> | 27.4 (4.5)               | 27.8 (4.4)               | 27.2 (4.3)               | 27.6 (4.2)               | 0.463      |
| <b>Hypertension</b>                      | 287 (69.2)               | 291 (70.1)               | 250 (60.2)               | 229 (55.2)               | <0.001     |
| <b>Smoking</b>                           | 223 (53.7)               | 248 (59.8)               | 239 (57.6)               | 266 (64.1)               | 0.008      |
| <b>Diabetes mellitus</b>                 | 81 (19.5)                | 118 (28.4)               | 124 (29.9)               | 154 (37.1)               | <0.001     |
| <b>Lipids</b>                            |                          |                          |                          |                          |            |
| Total cholesterol, mg/dl†                | 204 (47)                 | 196 (45)                 | 205 (47)                 | 207 (42)                 | 0.151      |
| LDL cholesterol, mg/dl†                  | 135 (43)                 | 128 (40)                 | 130 (38)                 | 122 (34)                 | <0.001     |
| HDL cholesterol, mg/dl†                  | 62 (16)                  | 56 (15)                  | 51 (14)                  | 45 (14)                  | <0.001     |
| Triglycerides, mg/dl ‡                   | 115 (49)                 | 131 (68)                 | 135 (66)                 | 172 (80)                 | <0.001     |
| Apolipoprotein B, mg/dl                  | 78 (21)                  | 87 (23)                  | 102 (26)                 | 114 (26)                 | <0.001     |
| LDLapoB, mg/dl                           | 62 (21)                  | 73 (22)                  | 88 (26)                  | 99 (26)                  | <0.001     |
| LDLapoB/LDLC <sub>calc</sub>             | 0.48 (0.04)              | 0.57 (0.02)              | 0.67 (0.03)              | 0.82 (0.09)              | -          |
| <b>C-reactive protein, mg/l</b>          | 3 (6)                    | 4 (7)                    | 5 (6)                    | 10 (17)                  | <0.001     |
| <b>Coronary artery disease</b>           |                          |                          |                          |                          |            |
| Any                                      | 321 (77)                 | 341 (82.2)               | 326 (78.6)               | 355 (85.5)               | 0.008      |
| Significant                              | 204 (49.2)               | 240 (57.8)               | 238 (57.3)               | 269 (64.8)               | <0.001     |
| <b>Statin</b>                            | 171 (41.2)               | 198 (47.7)               | 200 (48.2)               | 191 (46)                 | 0.109      |

**Legend:** Values are means (standard deviation) for continues variables and numbers (percentages) for categorical variables. \* for differences across the 4 groups calculated with  $\chi^2$  test for categorical variables and Jonckheere Terpstra Test for continuous variables. † to convert to millimoles per liter, multiply by 0.02586; ‡ to convert to millimoles per liter, multiply by 0.01129

## Supplementary Table S7

**Title:** Cardiovascular mortality according to LDLapoB/LDLC<sub>calc</sub> quartiles in the entire replication cohort

|                          | N   | CD (%)    | Model 1 *        |        | Model 2†         |       |
|--------------------------|-----|-----------|------------------|--------|------------------|-------|
|                          |     |           | HR (95% CI)      | P      | HR (95% CI)      | P     |
| 1 <sup>st</sup> quartile | 409 | 30 (7.3)  | 1.0 reference    | -      | 1.0 reference    | -     |
| 2 <sup>nd</sup> quartile | 407 | 52 (12.8) | 1.48 (0.79-2.77) | 0.216  | 1.41 (0.76-2.64) | 0.279 |
| 3 <sup>rd</sup> quartile | 411 | 60 (14.6) | 2.00 (1.10-3.61) | 0.021  | 1.64 (0.90-3.02) | 0.131 |
| 4 <sup>th</sup> quartile | 413 | 79 (19.1) | 2.70 (1.55-4.69) | <0.001 | 1.97 (1.09-3.55) | 0.024 |

**Legend:** N number, CD cardiovascular death; HR hazard ratio (calculated with Cox regression); CI confidence interval; \* adjusted for sex, age, statin use, and the interaction between statin use and LDLapoB/LDLC<sub>calc</sub> quartiles; † model 1 with additional adjustment for body mass index, hypertension, diabetes, HDL cholesterol, triglycerides, and smoking.
